# Supplementary material for: Thermodynamic and Evolutionary Coupling between the Native and Amyloid State of Globular Proteins
Source: PubMed Central journal article supplement — Cell Rep. 2020 Apr 14;31(2):107512. doi: 10.1016/j.celrep.2020.03.076 (PMC7175379; doi:10.1016/j.celrep.2020.03.076), 2020-04-14
Supplement: mmc1.pdf [file mmc1.pdf]

**Cell Reports, Volume 31**

## **Supplemental Information**

**Thermodynamic and Evolutionary**

**Coupling between the Native**

**and Amyloid State of Globular Proteins**

**Tobias Langenberg, Rodrigo Gallardo, Rob van der Kant, Nikolaos Louros, Emiel Michiels, Ramon Duran-Romaña, Bert Houben, Rafaela Cassio, Hannah Wilkinson, Teresa Garcia, Chris Ulens, Joost Van Durme, Frederic Rousseau, and Joost Schymkowitz**

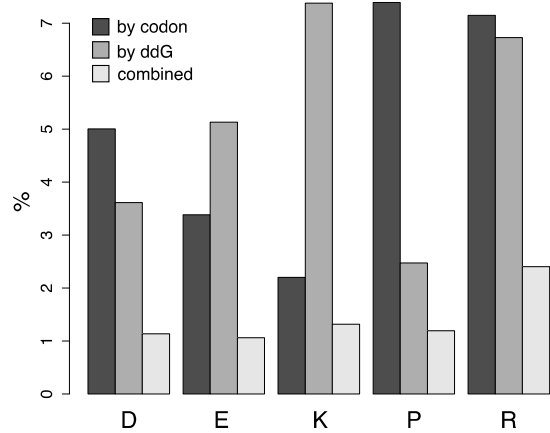

**Supplementary Figure 1. Percent chance of placing a gatekeeper residue in an APR based on codon usage or stability (by ddG), or both combined. Related to Figure 3.**

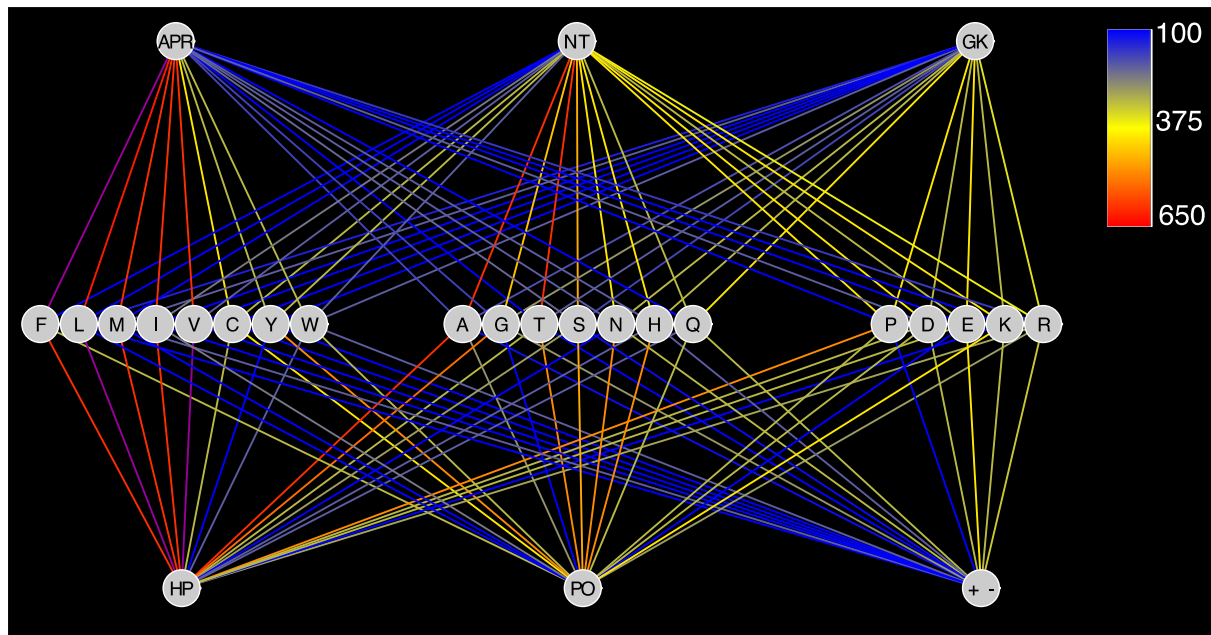

**Supplementary Figure 2. Network mapping of single nucleotide based transitional propensities related to physicochemical stability (bottom half) and aggregation proclivity (top half) of the 20 amino acid residue side chains. Related to Figure 3.** Top row nodes categorise mutational transitions as aggregation-prone, neutral or gatekeepers, whereas the bottom row is represented by nodes for transitions to hydrophobic, polar or charged states. Initial residue states are shown in single letter coding as the central node row of the graph. Network edges are colour-coded based on strength of transitional propensity (red to blue gradient). Single nucleotide mutations rarely switch to codons encoding for residues with altered physicochemical properties and this conservation is even stronger regarding the amyloid propensity of the transitional residues. This codon bias conservation highlights the coupling between aggregation propensity and globular stability of amino acid side chains.

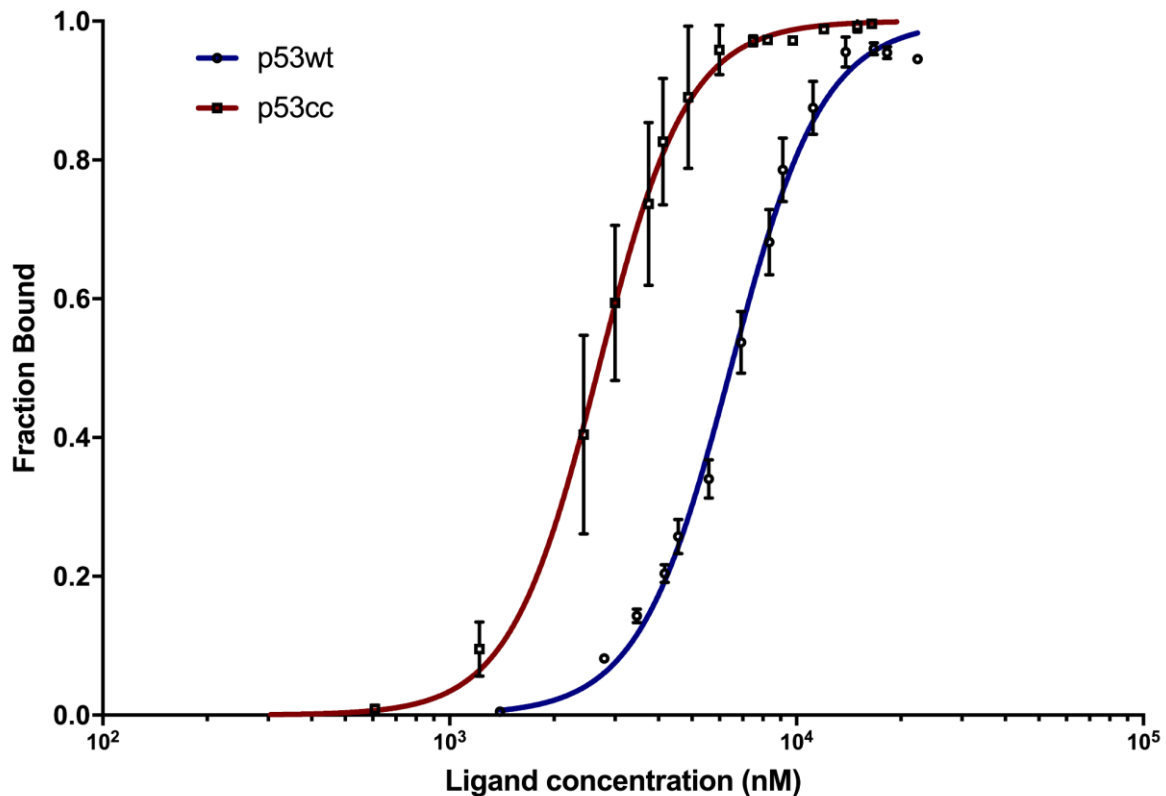

**Supplementary Figure 3. DNA-binding curves of p53cc and wt measured with microscale thermophoresis (MST). Related to Figure 5.** Raw fluorescence is normalized to the fraction of bound target shown in the vertical axis. Similar affinities were calculated for both p53cc and wt constructs ( $2.69 \mu\text{M} \pm 0.67 \mu\text{M}$  and  $6.47 \mu\text{M} \pm 0.70 \mu\text{M}$ , respectively). Measurements were carried out in triplicates and plotted using the Hill equation.

## Supplementary Tables

**Supplementary Table 1. T<sub>m</sub> values used. Related to Figure 1.**

| Species                        | Average T <sub>m</sub> value (degree Celsius) |
|--------------------------------|-----------------------------------------------|
| <i>E. coli</i>                 | 54                                            |
| <i>T. thermophiles</i>         | 79                                            |
| <i>S. cerevisiae</i>           | 51                                            |
| <i>H. sapiens</i> (Hela cells) | 56                                            |

**Supplementary Table 2. p53 homologs with low APR strength. Related to Figure 4.**

| APR or equivalent | TANGO score | UniProtKB ID     | homology   | species                                                               | % identity human p53 DBD |
|-------------------|-------------|------------------|------------|-----------------------------------------------------------------------|--------------------------|
| <i>IRVVFRLI</i>   | 0           | A9UZ33_MONBE     | p53-like   | <i>Monosiga brevicollis</i> (Choanoflagellate)                        | 34                       |
| <i>MMQLHFTL</i>   | 0           | A0A0N5E6D9_TRIMR | p63        | <i>Trichuris muris</i> (Mouse whipworm)                               | 32                       |
| <i>VYVDFSL</i>    | 0           | A0A0N4VCR4_ENTVE | p53-like   | <i>Enterobius vermicularis</i> (Human pinworm)                        | 31                       |
| <i>TELEFTL</i>    | 0           | A0A195C1G0_9HYME | p63        | <i>Cyphomyrmex costatus</i> (fungus breeding ant)                     | 29                       |
| <i>TELEFTL</i>    | 0           | A0A151XH99_9HYME | p63        | <i>Trachymyrmex zeteki</i> (fungus breeding ant)                      | 29                       |
| <i>TELEFTL</i>    | 0           | F4X756_ACREC     | p63        | <i>Acromyrmex echinator</i> (Panamanian leafcutter ant)               | 27                       |
| AIFTL             | 1,1         | V5GSV4_ANOGL     | p53        | <i>Anoplophora glabripennis</i> (Asian longhorn beetle)               | 32                       |
| LIFNL             | 1,2         | A0A154PH19_9HYME | p53        | <i>Dufourea novaeangliae</i> (solitary bee)                           | 31                       |
| IHTVF             | 1,8         | A0A0LOG1F4_9EUKA | p53-like   | <i>Sphaeroforma arctica</i> ( <i>Opisthokonta</i> , <i>Protozoa</i> ) | 30                       |
| IIFHL             | 1,8         | A8CSR7_NEMVE     | p53-like   | <i>Nematostella vectensis</i> (Starlet sea anemone)                   | 35                       |
| LNAVF             | 2,0         | Q4H300_CIOIN     | p53-like   | <i>Ciona intestinalis</i> (transparent sea squirt)                    | 40                       |
| AIQLSITL          | 2,4         | A0A0V0ZFM8_9BILA | p53        | <i>Trichinella patagoniensis</i> (Nematode)                           | 33                       |
| AIQLSVTL          | 2,5         | E5SR11_TRISP     | p53        | <i>Trichinella spiralis</i> (Nematode)                                | 32                       |
| AIQLSVTL          | 2,5         | A0A0V1GZU5_9BILA | p53        | <i>Trichinella zimbabwensis</i> (Nematode)                            | 31                       |
| TVFSL             | 4,3         | A0A0A9W1L4_LYGHE | p53        | <i>Lygus hesperus</i> (Western plant bug)                             | 30                       |
| LNICFAL           | 4,4         | F1L1F1_ASCSU     | p53        | <i>Ascaris suum</i> (Pig roundworm)                                   | 31                       |
| <b>"ILTIITL"</b>  | <b>76</b>   | -                | <b>p53</b> | <b>Craniata</b>                                                       | <b>66</b>                |

**Supplementary Table 3. p53 APR TANGO score and standard deviation per clade. Related to Figure 4.**

| <b>Clade</b>      | <b>N</b> | <b>TANGO score (SD)</b> |
|-------------------|----------|-------------------------|
| <i>Craniata</i>   | 136      | 76 (13)                 |
| <i>Mollusca</i>   | 12       | 76 (9)                  |
| <i>Diptera</i>    | 57       | 53 (22)                 |
| <i>Nematoda</i>   | 25       | 36 (30)                 |
| <i>Ixodida</i>    | 8        | 35 (22)                 |
| <i>Coleoptera</i> | 7        | 21 (21)                 |

**Supplementary Table 4. Selected mutations and codon usage. Related to Figure 4.**

| <b>Mutation</b> | <b>WT codon</b> | <b>Mutant codon</b> |
|-----------------|-----------------|---------------------|
| L252K           | CTC             | AAG                 |
| T256R           | ACA             | AGA                 |
| A138G           | GCC             | GGC                 |
| R267L           | CGG             | CTG                 |
| N268D           | AAC             | GAC                 |

**Supplementary Table 5. Data collection and refinement statistics. Related to Figure 4.**

| P53 charged core                                    |                           |
|-----------------------------------------------------|---------------------------|
| <b>Data collection</b>                              |                           |
| Beamline                                            | Proxima1 (Soleil, France) |
| Date of collection                                  | 10-Feb-2017               |
| Wavelength (Å)                                      | 0.9786                    |
| Space group                                         | C222 <sub>1</sub>         |
| Cell dimensions                                     |                           |
| <i>a</i> , <i>b</i> , <i>c</i> (Å)                  | 68.42, 84.96, 84.85       |
| $\alpha$ , $\beta$ , $\gamma$ (°)                   | 90.0, 90.0, 90.0          |
| Resolution (Å)                                      | 42.48-1.67 (1.73-1.67)*   |
| <i>R</i> <sub>sym</sub> (%)                         | 8.2 (72.4)                |
| <i>R</i> <sub>meas</sub> (%)                        | 8.6 (78.0)                |
| <i>I</i> / $\sigma$ <i>I</i>                        | 17.2 (2.6)                |
| CC <sub>1/2</sub> (%)                               | 99.9 (83.4)               |
| Completeness (%)                                    | 98.2 (95.1)               |
| Redundancy                                          | 7.8 (7.2)                 |
| No. total reflections                               | 222350 (19402)            |
| No. unique reflections                              | 28518 (2713)              |
| <b>Refinement</b>                                   |                           |
| Resolution (Å)                                      | 1.67                      |
| <i>R</i> <sub>work</sub> / <i>R</i> <sub>free</sub> | 17.8 / 19.4               |
| No. atoms                                           | 1866                      |
| Protein                                             | 1602                      |
| Ligand/ion                                          | 13                        |
| Water                                               | 251                       |
| Average <i>B</i> -factor                            | 15.32                     |
| <i>B</i> -factor Protein                            | 12.60                     |
| <i>B</i> -factor Ligand/ion                         | 30.26                     |
| <i>B</i> -factor Water                              | 31.89                     |
| R.m.s. deviations                                   |                           |
| Bond lengths (Å)                                    | 0.024                     |
| Bond angles (°)                                     | 2.1                       |
| Ramachandran outliers (%)                           | 0.0                       |
| Ramachandran favored (%)                            | 99.5                      |
| Ramachandran allowed (%)                            | 0.5                       |

\*Values in parentheses are for highest-resolution shell.
